# Supplementary material for: Elucidating Interfacial Water Structures and Photothermal Dynamics in Photocatalytic Water Splitting Reaction
Source: Research Square preprint supplement (doi:10.21203/rs.3.rs-6403696/v1), 2025-04-28
Supplement: Supplementary file 1 [file 17384a30d5ddf5e8706434cf.docx]

**Supplementary information**

**Elucidating Interfacial Water Structures and Photothermal Dynamics in Photocatalytic Water Splitting Reaction**


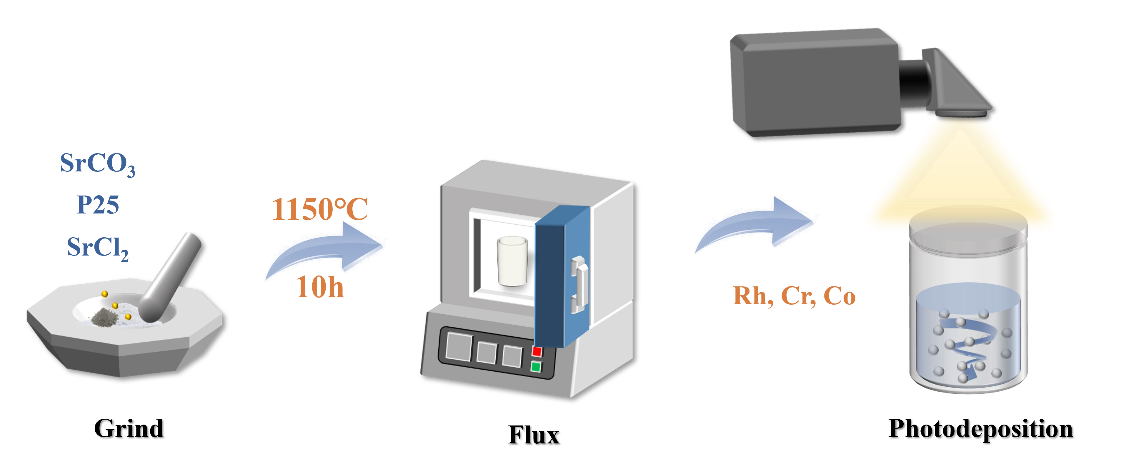


Figure S1. Preparation process of RhCrOx/SrTiO3/CoOOH photocatalyst.


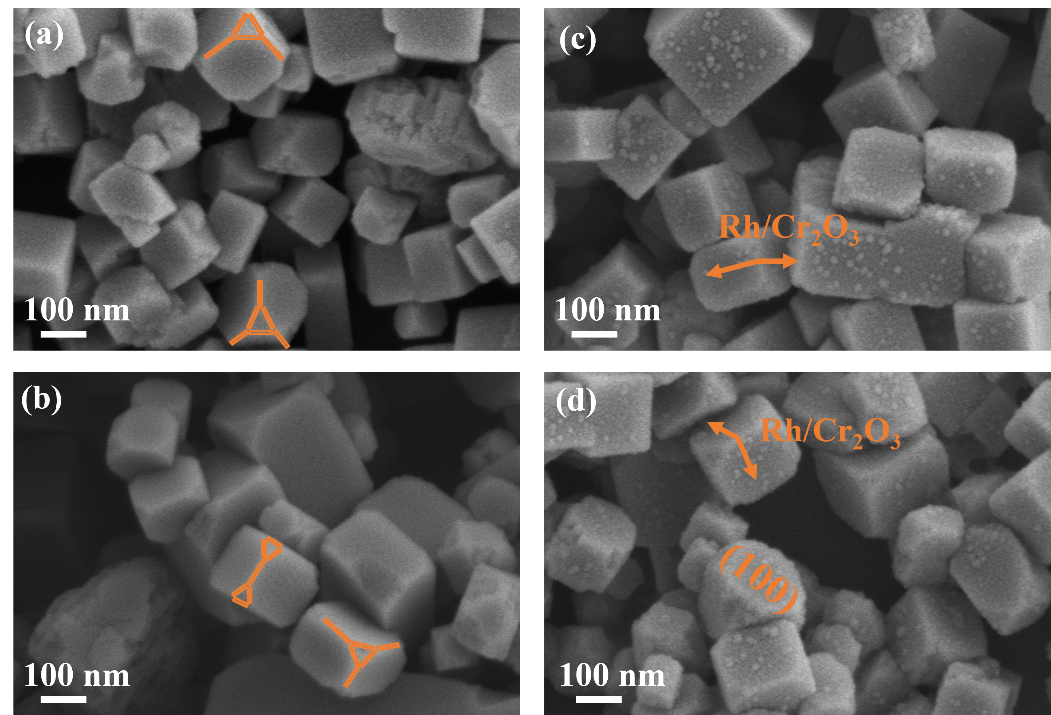


Figure S2. SEM images of (a-b) SrTiO3 and (c-d) RhCrOx/SrTiO3/CoOOH.


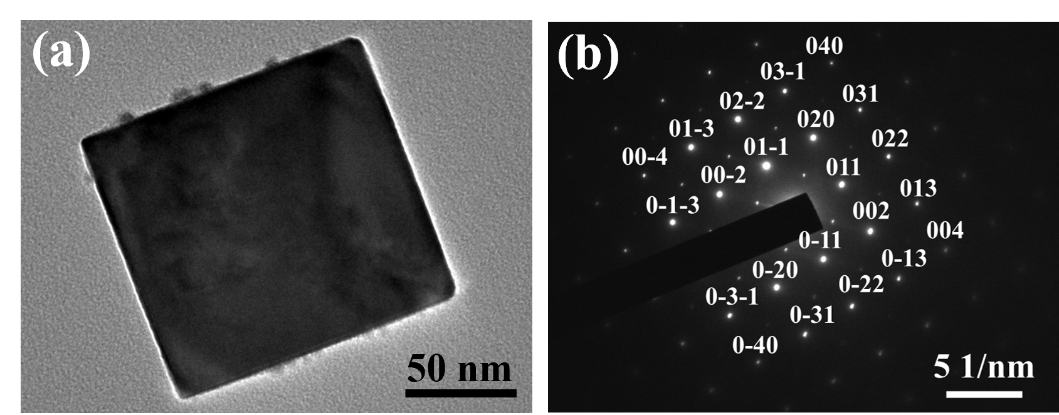


Figure S3. (a) TEM image and (b) SAED image of RhCrOx/SrTiO3/CoOOH.

As revealed by the SEM and TEM images, the SrTiO3 photocatalyst fabricated via the high-temperature molten salt method presents the exposure of specific crystal planes (Figure S1-2). Specifically, the lattice fringe spacings of 0.39 nm and 0.27 nm correspond to the {100} and {110} crystal planes of SrTiO3, respectively (Figure 1a, Figure S3). It is evident from the figures that the cocatalysts tend to be directionally deposited on different crystal planes, RhCrOx and CoOOH are deposited on the {100} and {110} surfaces, respectively, which verifies the successful preparation of the SrTiO3 photocatalyst. Such a special structural design facilitates the directional separation of photoexcited charges.


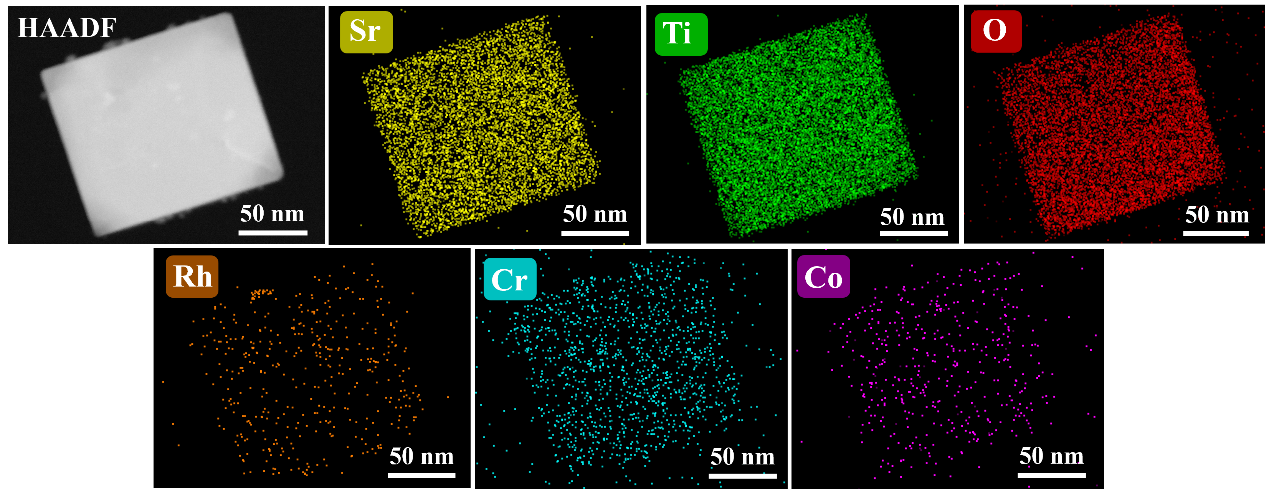


Figure S4. HAADF image and EDS elemental mapping images of RhCrOx/SrTiO3/CoOOH.

Additionally, the EDS element mapping of the selected area, as shown in Figure S4, indicates that the elements Sr, Ti, and O are uniformly distributed, Meanwhile, the uniform distribution of Rh, Cr, and Co elements on the photocatalyst surface demonstrates the successful loading of the cocatalyst.


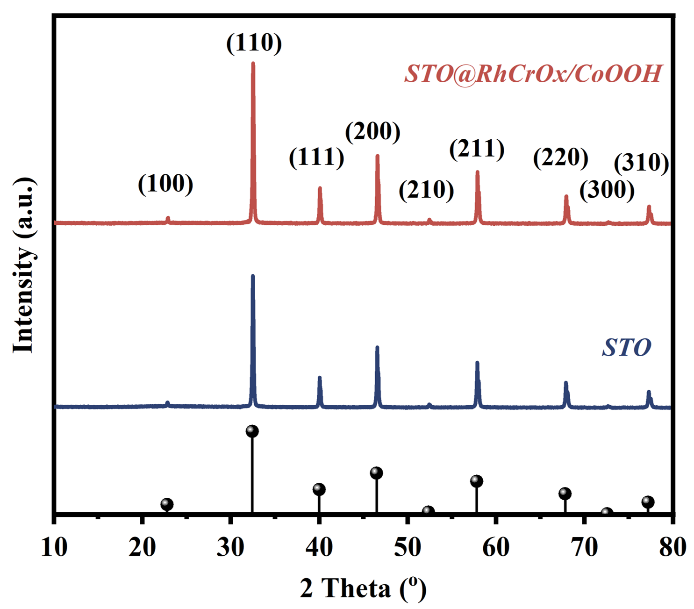


Figure S5. XRD patterns of SrTiO3 and RhCrOx/SrTiO3/CoOOH.


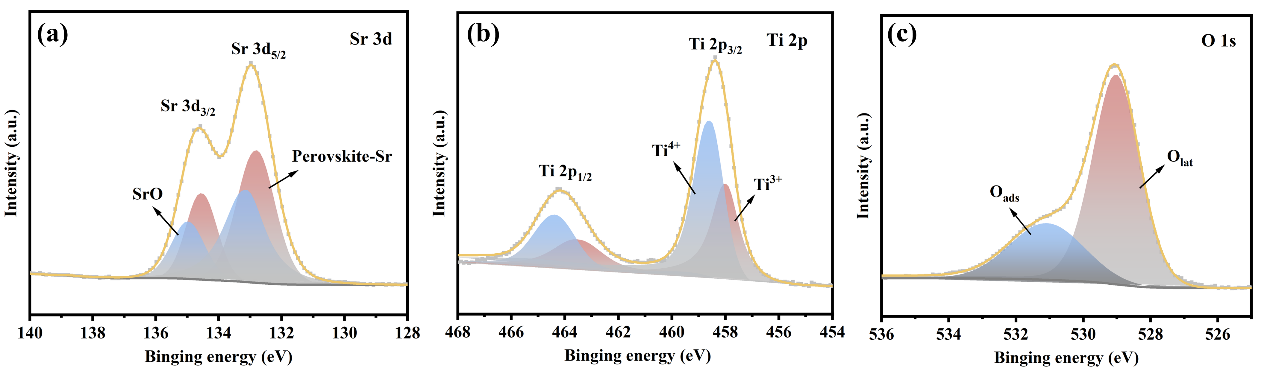


Figure S6. XPS spectra of SrTiO3: (a) Sr 3d; (b) Ti 2p; (c) O 1s.

Moreover, other phase structure characterizations (Figure S5) and chemical composition analyses (Figure S6) further corroborate the successful fabrication of SrTiO3.


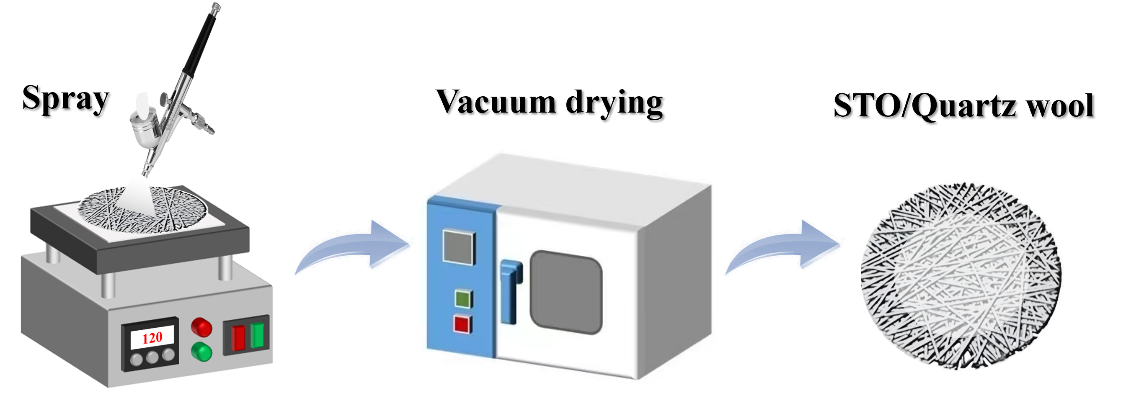


Figure S7. Preparation process of Quartz wool/RhCrOx/SrTiO3/CoOOH composite photocatalyst.


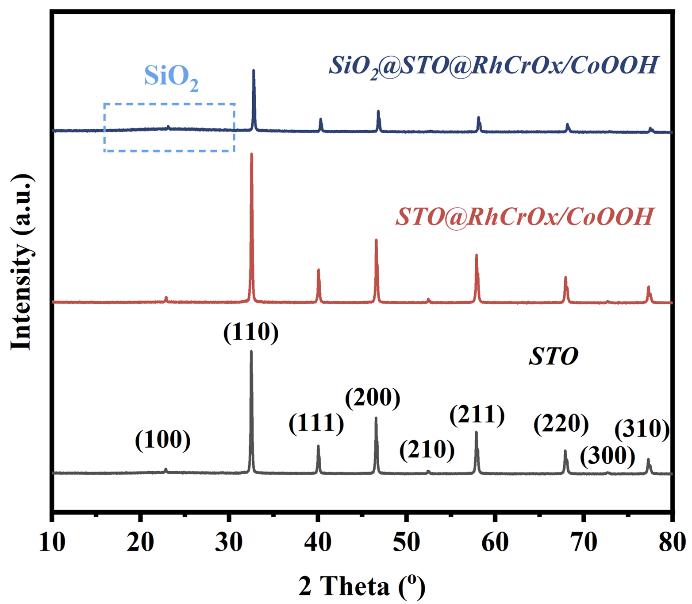


Figure S8. XRD patterns of SrTiO3, RhCrOx/SrTiO3/CoOOH and Quartz wool/RhCrOx/SrTiO3/CoOOH.


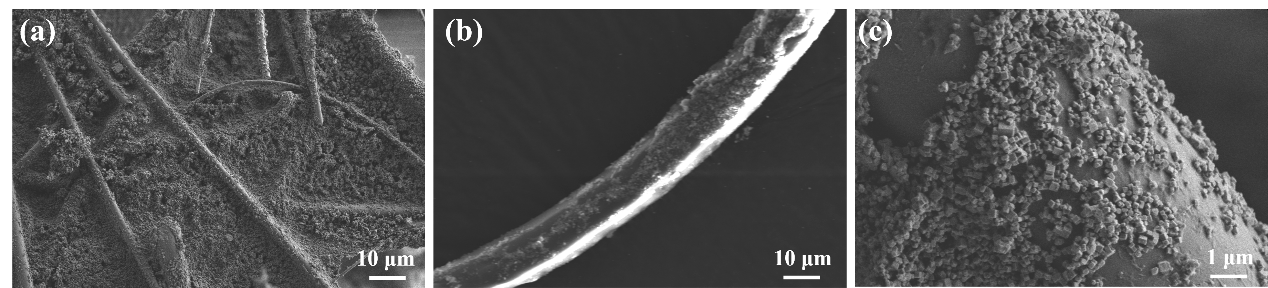


Figure S9. SEM images of Quartz wool/RhCrOx/SrTiO3/CoOOH.


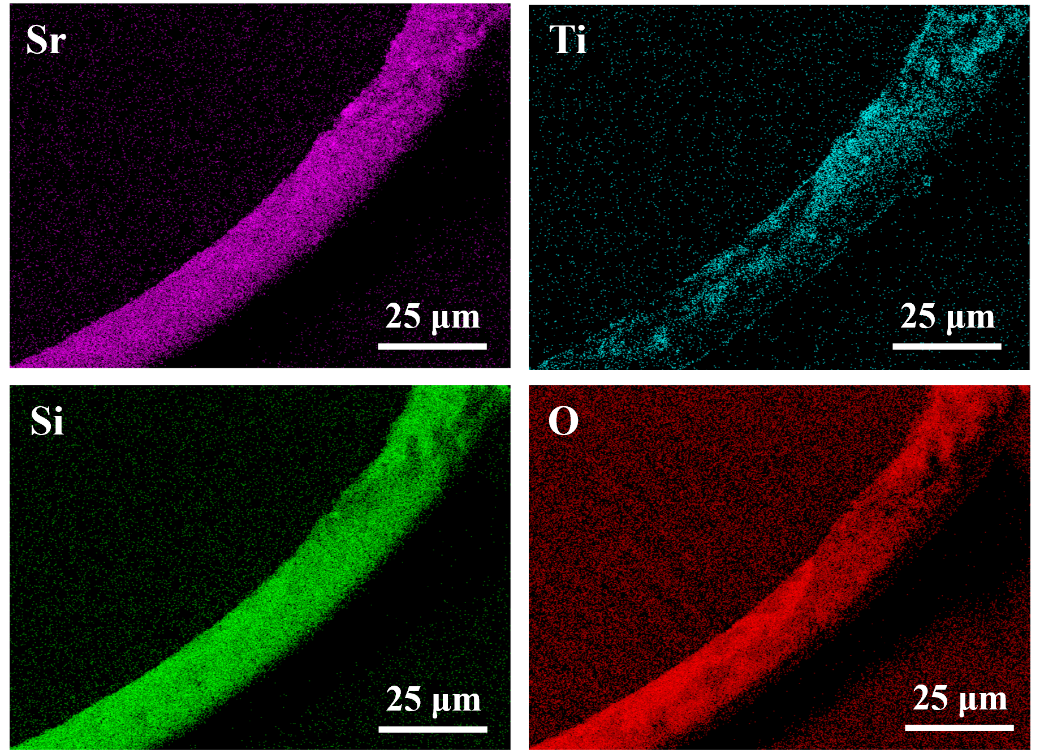


Figure S10. EDS elemental mapping images of Quartz wool/RhCrOx/SrTiO3/CoOOH.


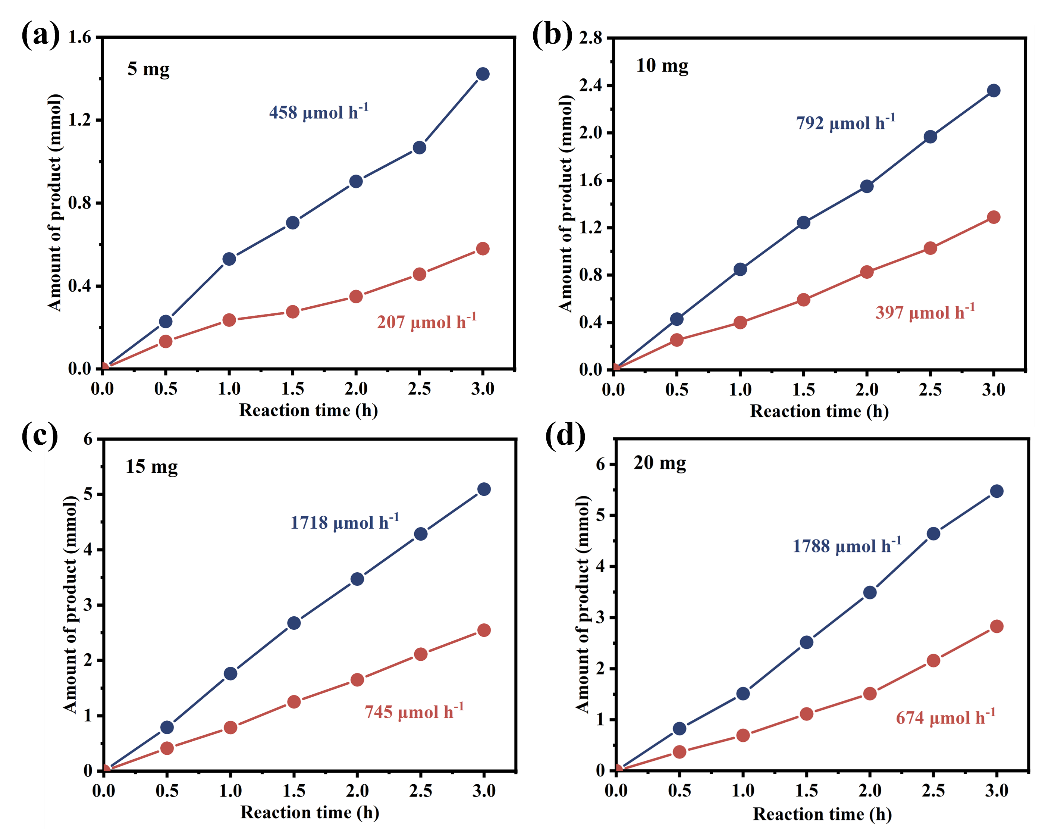


Figure S11. Relationship between the loading amount of photocatalysts and the activity rate of photocatalytic pure water splitting: (a) 5 mg; (b) 10 mg; (c) 15 mg; (d) 20 mg.


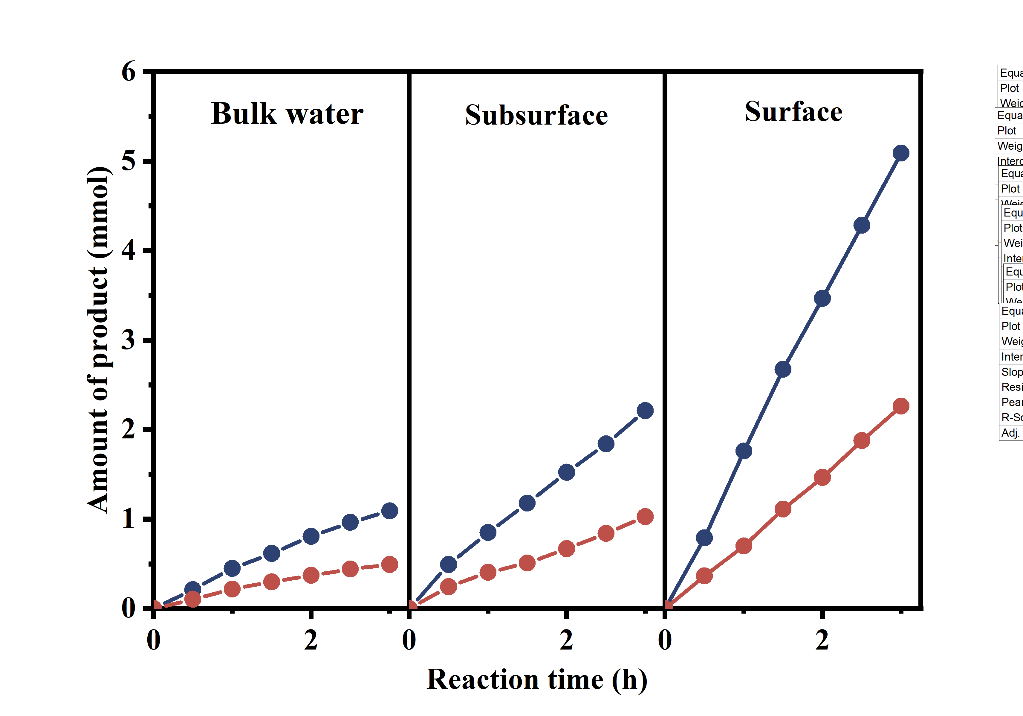


Figure S12. The photocatalytic overall water splitting activity rates in three systems (Bulk water, Subsurface, Surface).


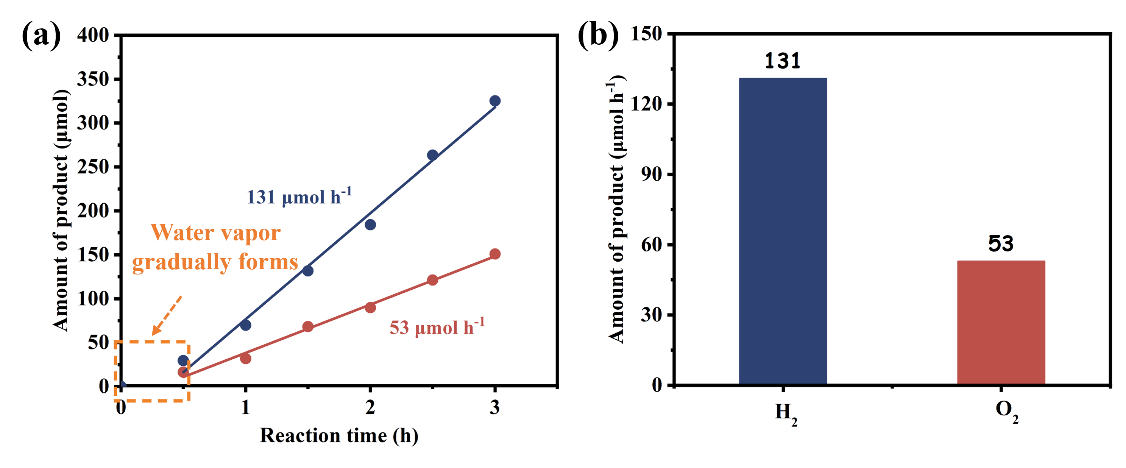


Figure S13. The photocatalytic overall water splitting activity rate in Gas-solid phase testing system.


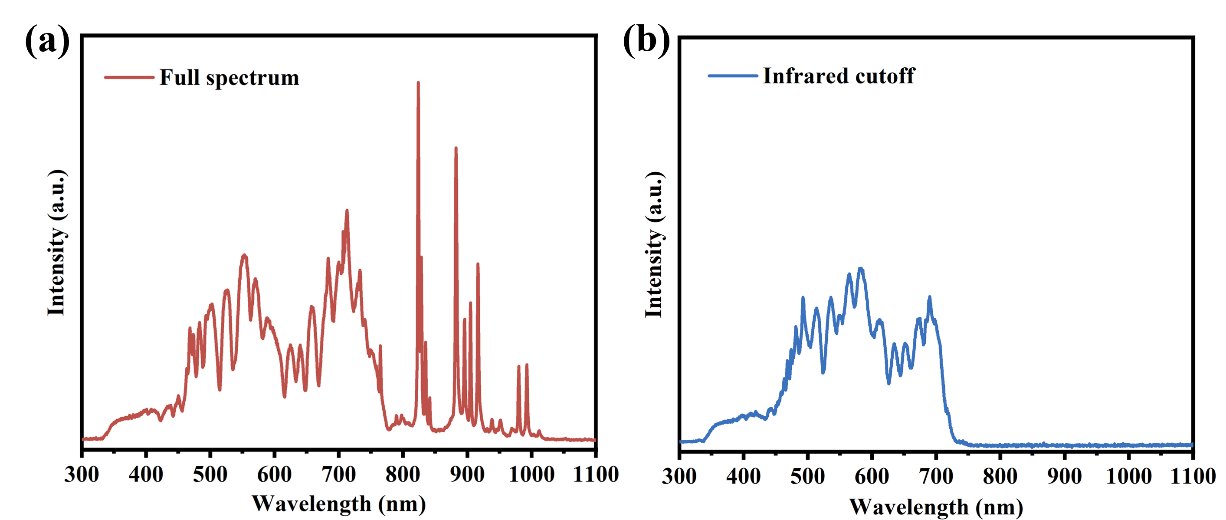


Figure S14. Spectral diagram: (a) Full spectrum (300 W Xenon lamp); (b) 300 W Xenon lamp equipped with an infrared cut-off filter.


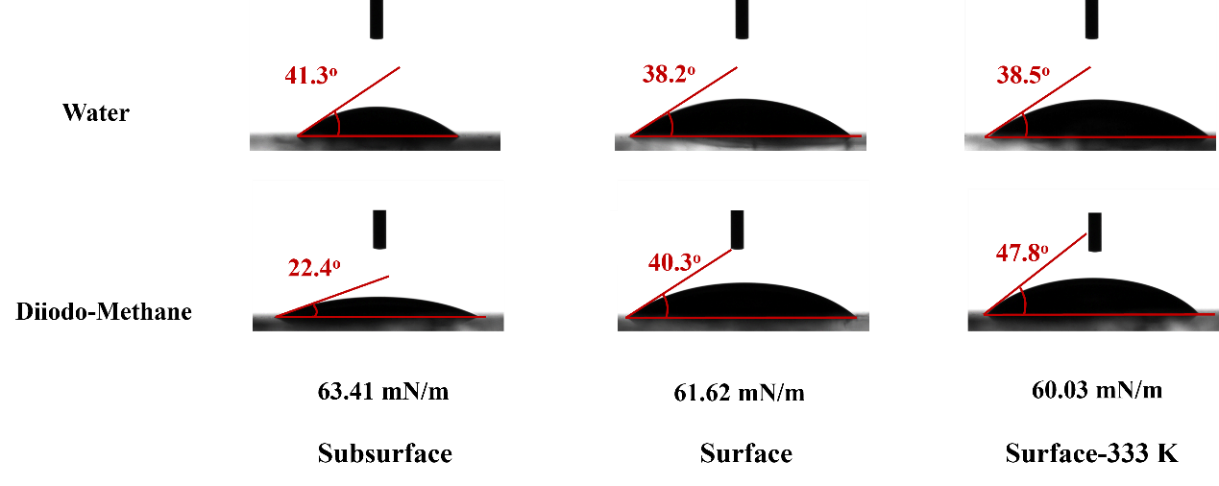


Figure S15. Contact angles of polar solvent-water and non-polar solvent-diiodomethane on the photocatalyst surface under Subsurface, Surface and Surface-333 K conditions.


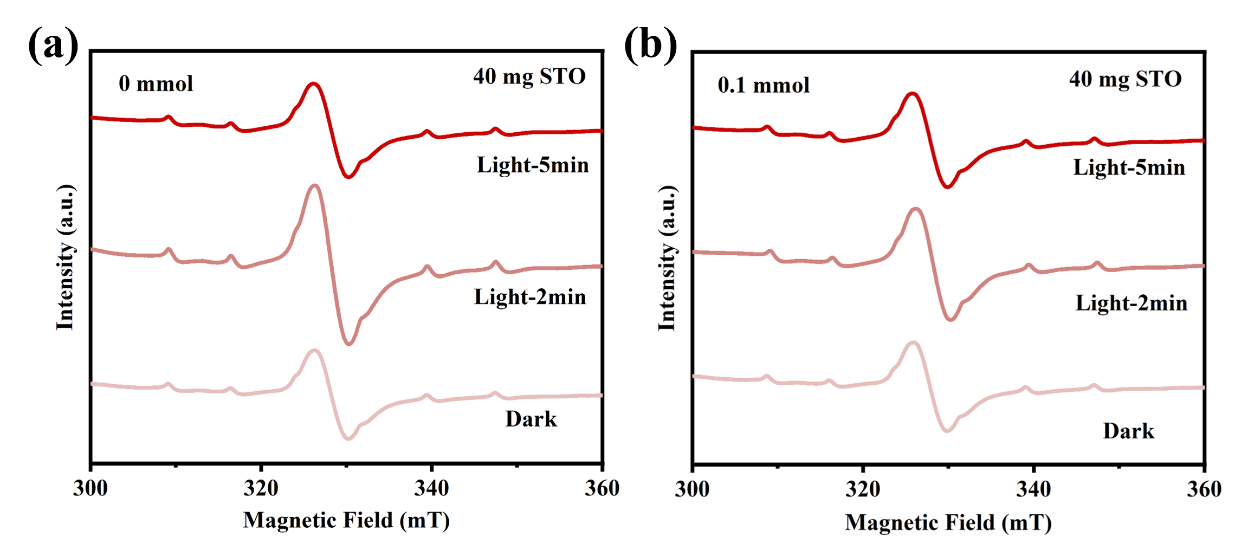


Figure S16. EPR Spectra of photocatalysts with (a) 0 mmol and (b) 0.1 mmol of water Loading.


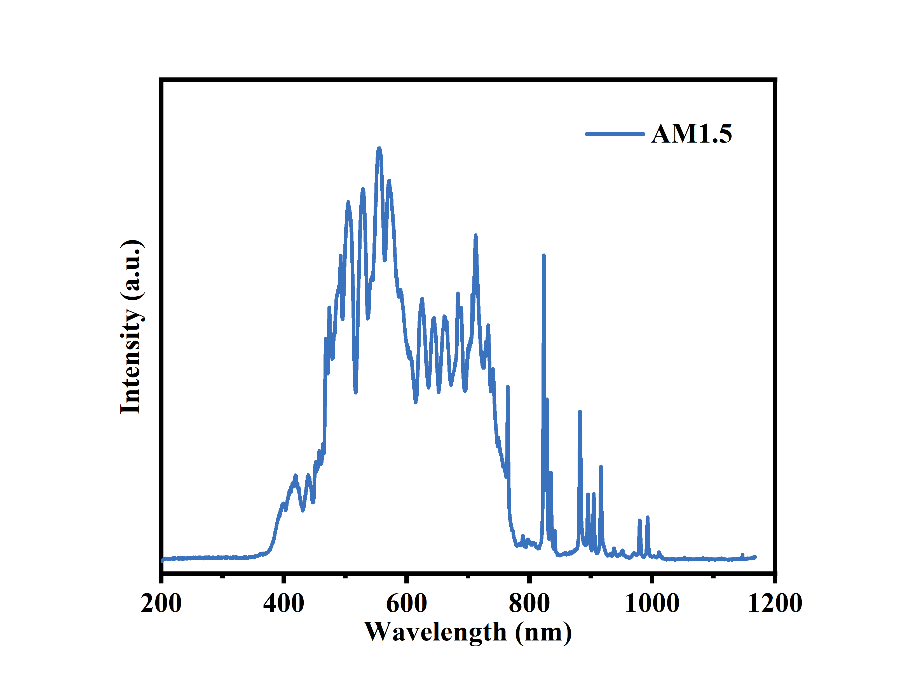


Figure S17. Spectral Diagram of 300 W Xenon Lamp Equipped with AM 1.5 Filter.


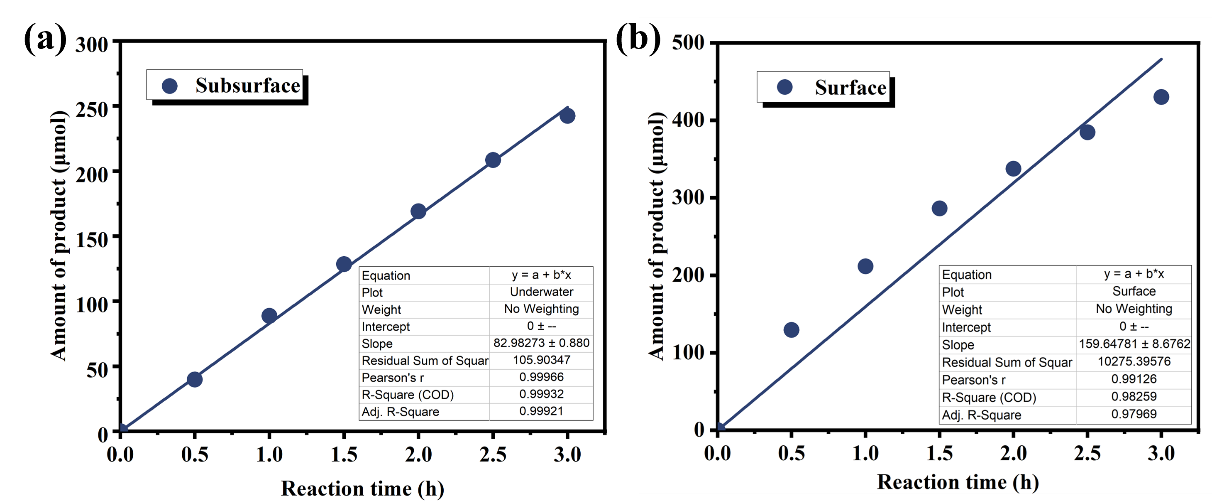


Figure S18. Photocatalytic hydrogen production rates under AM 1.5 light illumination for (a) Subsurface and (b) Surface systems.


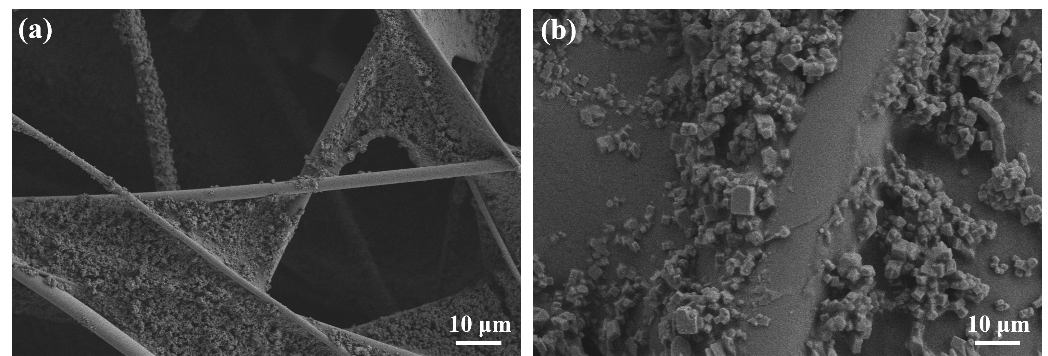


Figure S19. SEM image of Quartz wool/RhCrOx/SrTiO3/CoOOH after 15 h of testing
